# Supplementary material for: Low‐Dose Colchicine Ameliorates Doxorubicin Cardiotoxicity Via Promoting Autolysosome Degradation
Source: PubMed Central journal article supplement — J Am Heart Assoc. 2024 May 3;13(9):e033700. doi: 10.1161/JAHA.123.033700 (PMC11179898; doi:10.1161/jaha.123.033700), 2024-05-03
Supplement: JAH3-13-e033700-s001.pdf [file JAH3-13-e033700-s001.pdf]

# **SUPPLEMENTAL MATERIAL**

## Data S1.

### Supplemental Methods

The small molecule drugs were purchased as below: Doxorubicin (S7306, Selleck), Colchicine (S2284, Selleck) and Chloroquine (S6999, Selleck). Plasmid Miniprep Kit (#DK001-01A, novoprotein, China), PrimeScript RT reagent Kit (#RR037A, TAKARA). The antibodies used in this study were as follows: anti-GAPDH (#60004-1-Ig, proteintech); anti-SQSTM1/P62(#ab56416, abcam); anti-LC3B (#ab48394, abcam); anti-phospho-mTOR (Ser2448, #ab109268, abcam); anti-phospho-AMPK (#ab133448, abcam), anti-phospho-ULK1 (Ser757, #14202, Cell Signaling Technology); anti-ATG5 (#ab118327, abcam); anti- phospho-PI3K (Try199, #4228, Cell Signaling Technology); anti-phospho-AKT (Try308, #ab105731, abcam); anti-Beclin1 (#11306, proeintech); anti-TP53 (#60283, proeintech); anti-PINK1 (#23274, proeintech); anti-Parkin (#14060, proeintech); anti-TOM20 (#11802, proeintech); anti- $\alpha$ -Tubulin (#ab7291, abcam); anti- $\beta$ -Tubulin (#sc-5274, santa cruz); anti-rabbit IgG (#ab6721, abcam); anti-mouse IgG (#ab6728, abcam). WB Ultra-Sensitive ECL Luminescent Liquid (#ED0015-B, SparkJade, China).

**Table S1. Echocardiography of hamsters in different groups.**

| Syrian hamster | PBS               | DOX                   | DC0.1                 | DC0.5                 |
|----------------|-------------------|-----------------------|-----------------------|-----------------------|
| n              | 6                 | 6                     | 6                     | 4                     |
| FS (%)         | 32.76%±<br>54.16% | 21.64%±<br>5.236% (*) | 30.22%±<br>4.639% (†) | 20.83%±<br>4.043% (‡) |
| LVEF (%)       | 61.01%±<br>7.18%  | 43.75%±<br>8.854% (*) | 57.07±<br>7.271% (†)  | 42.32%±<br>7.555% (‡) |
| LV VOL s(μl)   | 35.66±<br>6.821   | 48.22±<br>12.39       | 53.79±<br>21.28       | 64.93±<br>34.71       |
| LV VOL d(μl)   | 92.22±<br>13.37   | 87.44±<br>27.74       | 121.7±<br>33.18       | 109.1±<br>46.54       |
| LVID s(mm)     | 3.012±<br>0.2459  | 3.401±<br>0.3697      | 3.525±<br>0.6136      | 3.781±<br>0.8653      |
| LVID d(mm)     | 4.486±<br>0.2803  | 4.359±<br>0.5496      | 5.025±<br>0.6047      | 4.752±<br>0.8988      |
| LVPW s(mm)     | 1.819±<br>0.0958  | 1.739±<br>0.085       | 1.695±<br>0.1782      | 1.745±<br>0.277       |
| LVPW d(mm)     | 1.397±<br>0.1363  | 1.577±<br>0.1417      | 1.377±<br>0.1977      | 1.654±<br>0.297       |
| IVS s(mm)      | 1.884±<br>0.1434  | 1.81±<br>0.1616       | 1.852±<br>0.1719      | 1.872±<br>0.2181      |
| IVS d(mm)      | 1.346±<br>0.2096  | 1.415±<br>0.1928      | 1.339±<br>0.2345      | 1.37±<br>0.2197       |

Fraction shortening (FS); left ventricle ejection fraction (LVEF); left ventricle volume in the end-diastole (LV Vol;d) and end-systole period (LV Vol;s). internal dimension of the left ventricle in the end-diastole (LV ID;d) and end-systole period(LV ID;s). LV posterior wall thickness in the end-diastole (LVPW; d) and end-systole period (LVPW; s).; internal septal thickness in the end-diastole (IVS; d) and end-systole period (IVS; s). DOX: Doxorubicin; DC0.1: DOX + Colchicine (0.1mg/kg, daily); DC0.5: DOX + Colchicine (0.5mg/kg, daily) Means ± SD, one - way ANOVA (Tukey post- test). \* <0.05 vs. PBS group; †<0.05 vs. DOX group; ‡ <0.05 vs. PBS group.

**Figure S1. Low-dose colchicine alone is well tolerable for Syrian hamsters.**

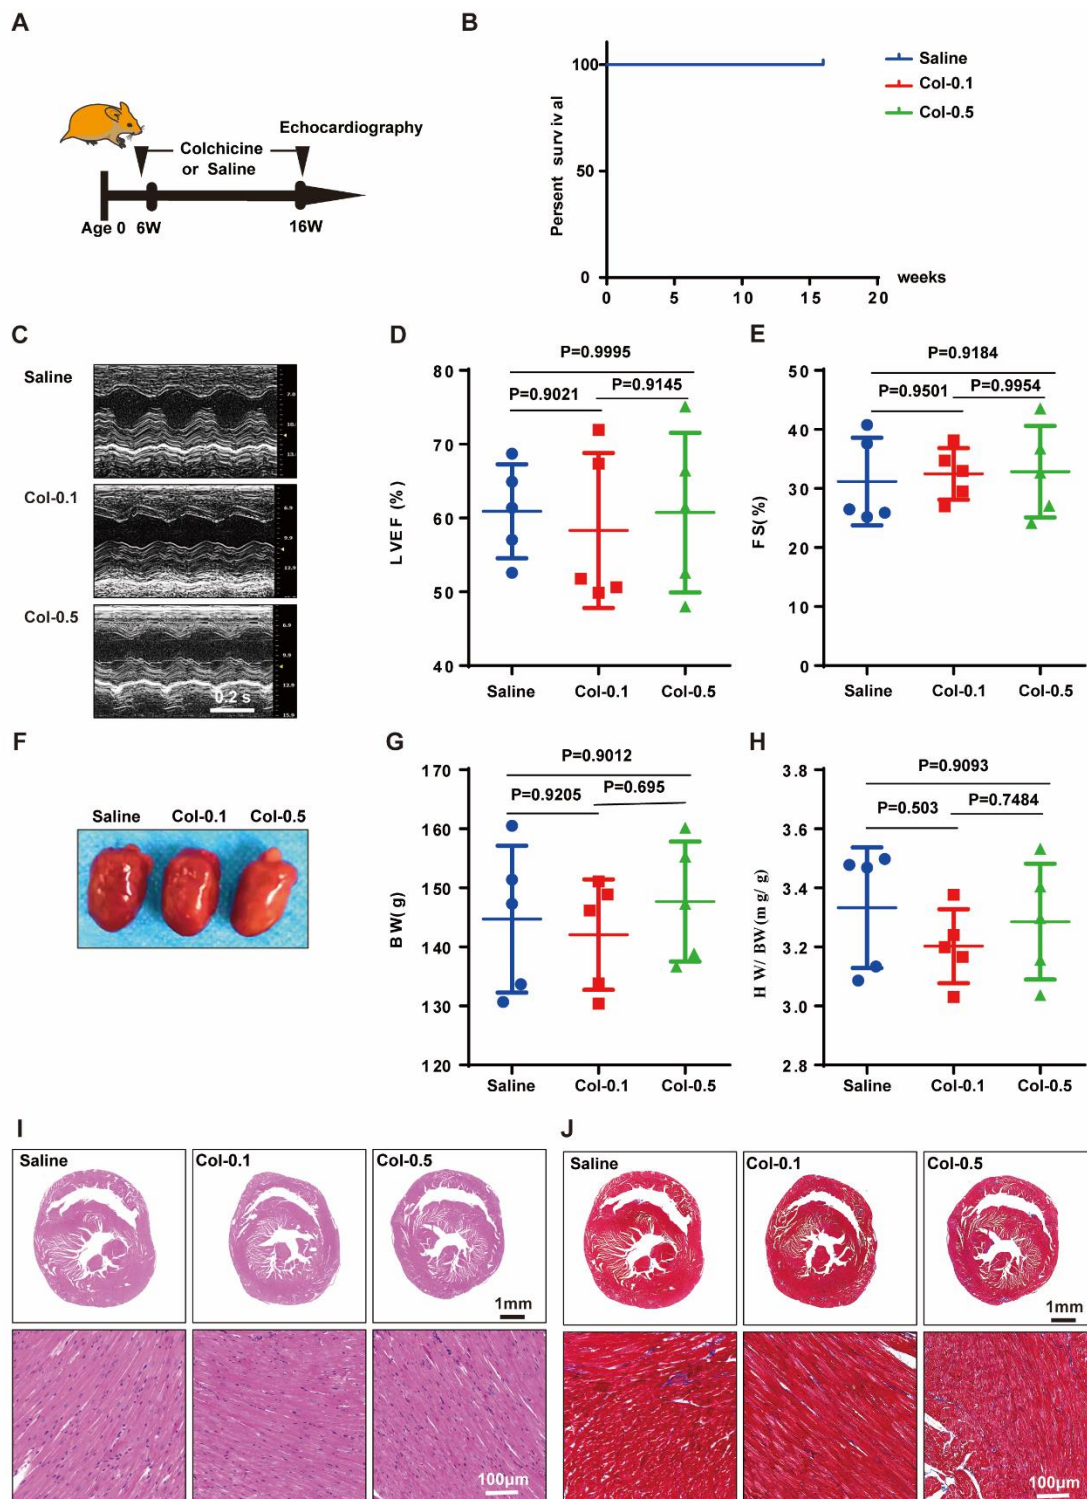

**A.** Schematic of *in vivo* colchicine administration experimental protocol. **B.** Kaplan–Meier survival analysis hamsters in different groups. (n=5 per group, none died during the performance), means  $\pm$  SD, *P* value was determined by log-rank (Mantel–Cox) test. **C–E.** Representative M-mode echocardiographic images and LVEF, FS measurements of Syrian hamsters treated with PBS, 0.1mg/kg and 0.5mg/kg colchicine (Col-0.1 and Col-0.5). **F–H.** Representative

gross morphology of the hearts from different groups, and measurements of body weight (BW), heart weight/body weight (HW/BW). Data of (**D**, **E**, **G** and **H**) are analyzed by one-way ANOVA (Tukey post- test), means  $\pm$  SD. **I-J**. Representative hematoxylin and eosin (H&E) and Masson's trichrome staining of heart sections from different groups, similar results were found in more than three different hamsters for each group. For **D-H**, data were presented as means  $\pm$  SD, 2-tailed Student *t* test.

**Figure S2. DOX induced heart failure and impaired autophagy in Syrian hamsters.**

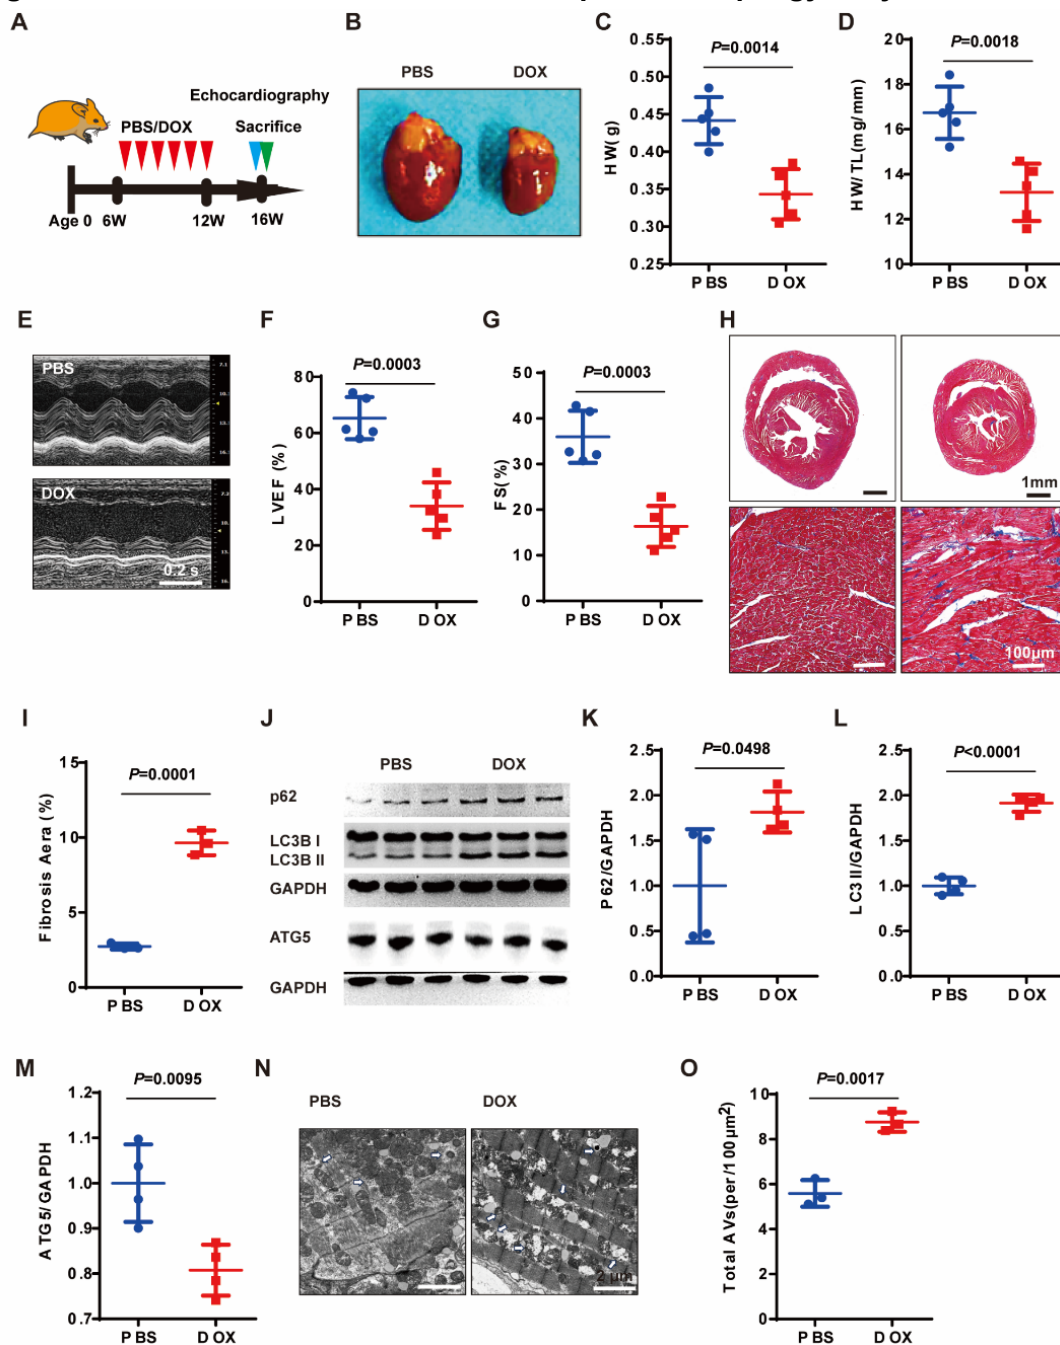

**A.** Schematic of *in vivo* DOX induced heart failure experimental protocol. **B.** Gross morphology of the heart from PBS and DOX treated hamsters. **C-D.** Heart weight (HW) and ratios of heart weight to tibia length (HW/TL). **E-G.** Representative M-mode echocardiographic images and LVEF, FS measurements of Syrian hamsters treated with PBS or DOX. For above data,  $n=5$  each group. **H-I.** Representative Masson's trichrome staining and measurements of fibrosis. **J-M.** Representative WB analysis and quantification of the expression of P62, LC3 and ATG5. ( $n=4$  per group). **N.** Representative TEM images showing AVs marked by white arrow. **O.** Measurements of the autophagic vacuoles (AVs) per 100  $\mu\text{m}^2$  (3 random fields per sample,  $n=3$  per group). DOX indicates doxorubicin; AVs indicates autophagic vacuole. For all data were represented as means  $\pm$  SD, 2-tailed Student t test.

**Figure S3. DOX induced damaged mitochondrial and ROS overload in hamster hearts.**

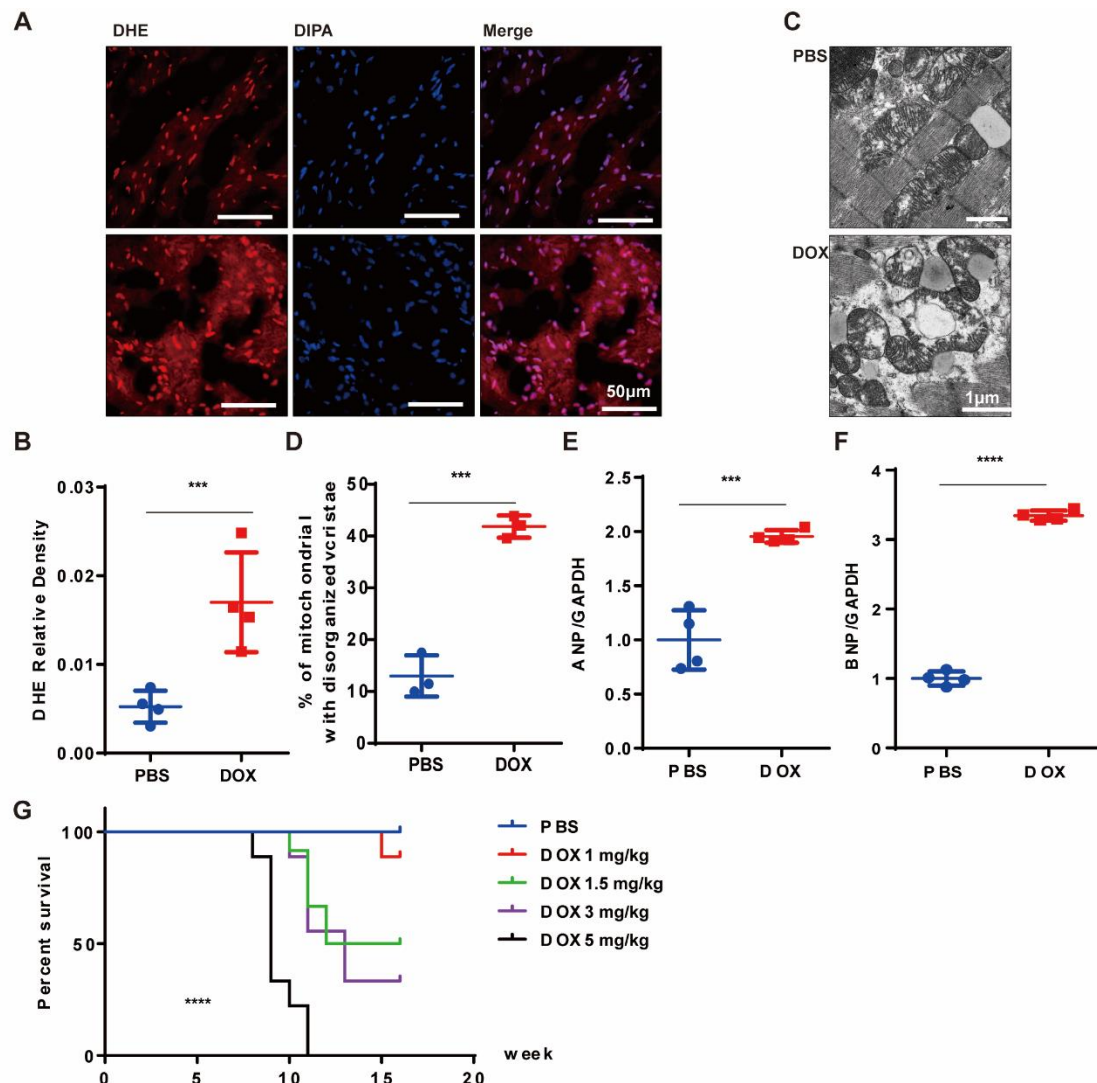

**A.** Representative immunofluorescence staining for labeling reactive oxygen species (ROS). Left, dihydroethidium (DHE); middle, DAPI; right, Merge. **B.** Quantification of the ROS level (n=4 per group). **C-D.** Representative TEM images for labeling mitochondrial and quantitative analyses of mitochondrial cristae (3 random fields per sample, n=3 per group). **E-F.** Quantitative q-PCR analysis of ANP and BNP mRNA expression (n=4 per group). **G.** Kaplan–Meier survival analysis of hamsters in different groups. (n=8-12 per group), means ± SD, *P* value was determined by log-rank (Mantel–Cox) test. ANP indicates atrial natriuretic peptide, BNP, brain natriuretic peptide. For all data were represented as means ± SD, 2-tailed Student *t* test, *P* > 0.05, non-significant (ns), \* *P* < 0.05, \*\* *P* < 0.01, \*\*\* *P* < 0.001, \*\*\*\* *P* < 0.0001.

**Figure S4.  $\alpha$ -Tubulin immunocytochemistry analysis for the microtubule network in hiPSC-CMs.**

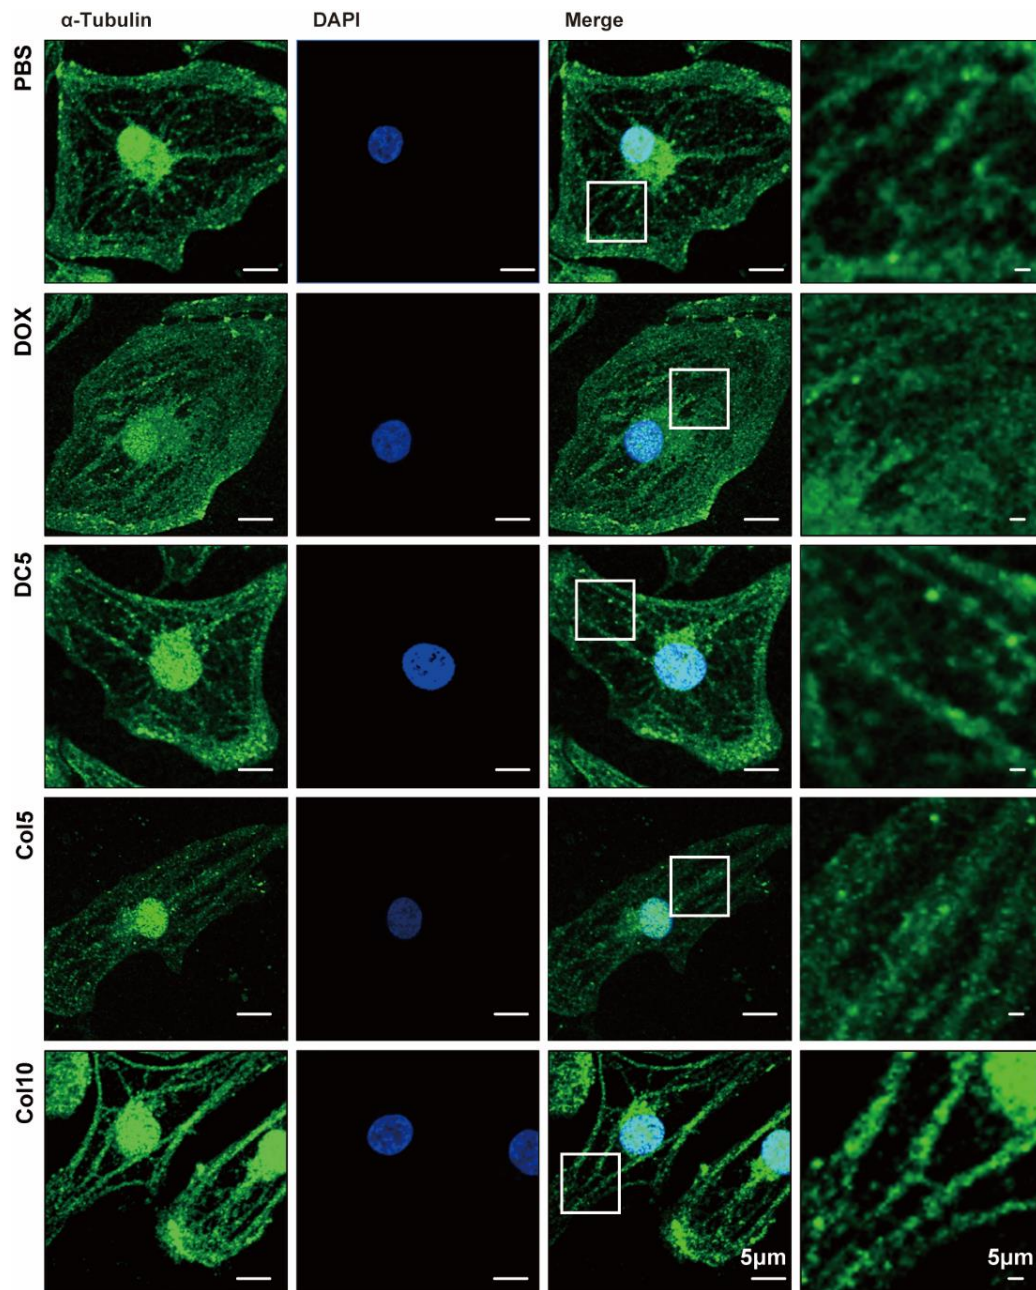

DC5 indicates doxorubicin + colchicine (5nM). Col5, Col10 indicates colchicine 5nM, 10nM respectively.



**Figure S5. Low-dose colchicine rebalanced cellular homeostasis in Syrian hamsters.**

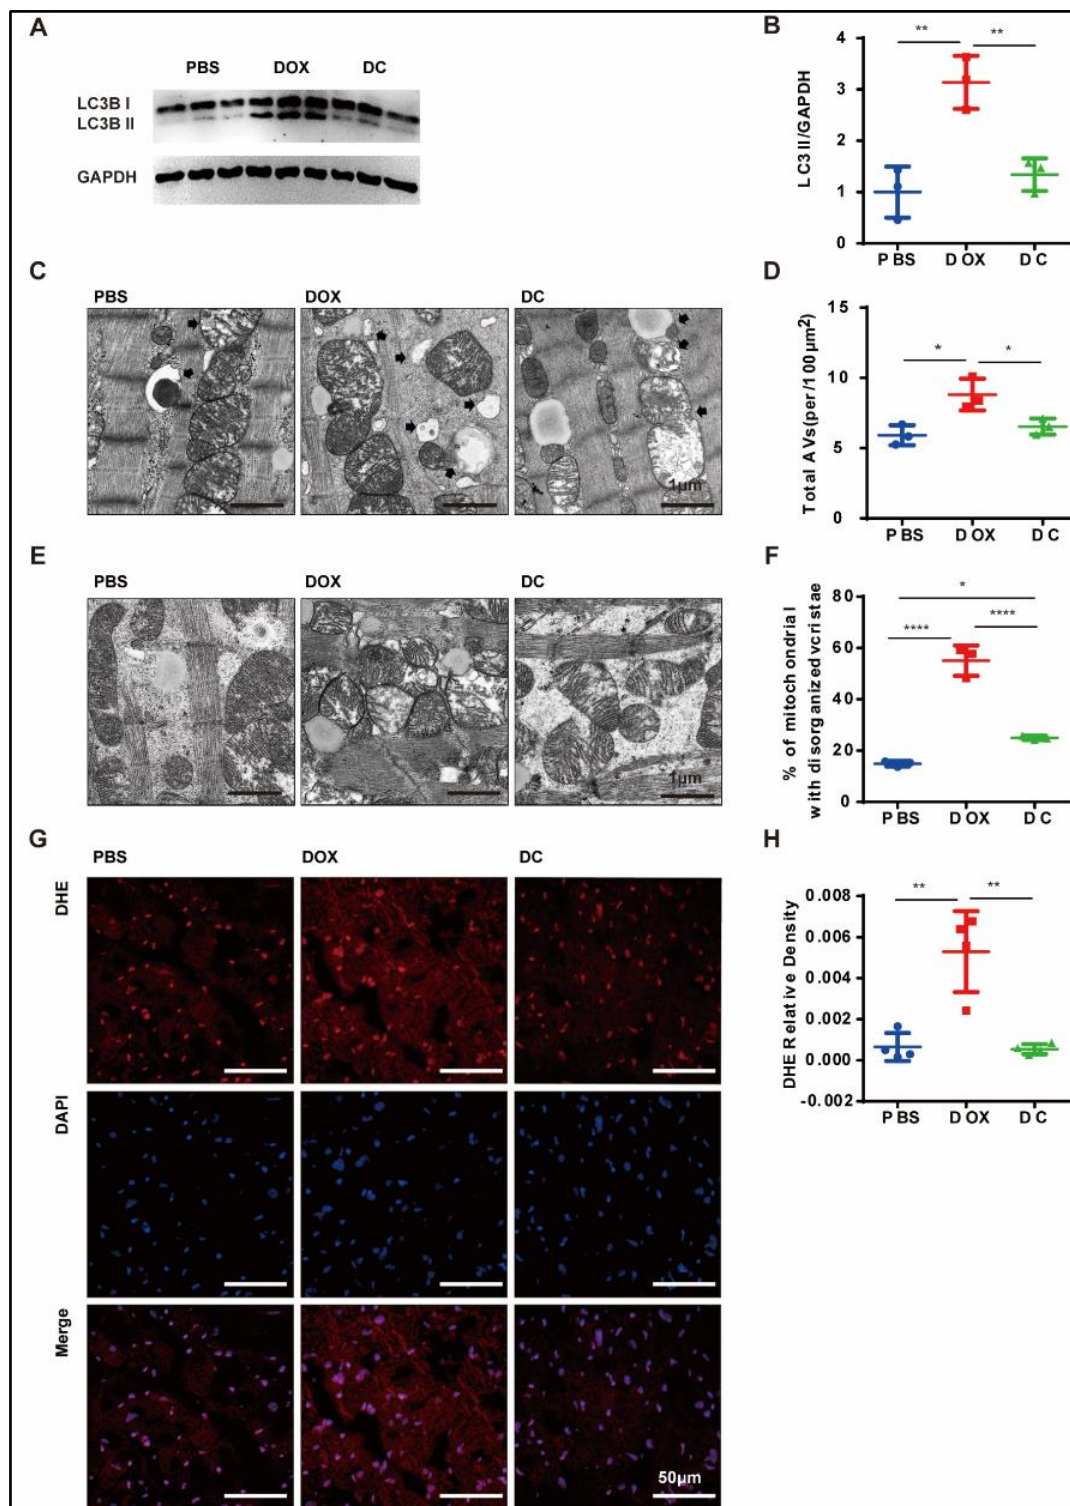

**A-B.** Representative WB analysis and quantification of the LC3B-II. **C.** Representative TEM images showing AVs marked by black arrow. **D.** Measurements of the AVs per100 μm<sup>2</sup> (3 random fields per sample). **E-F.** Representative TEM images for labeling mitochondrial and quantitative analyses of mitochondrial cristae (3 random fields per sample). (For **B**, **D** and

**F** n=3 per group). **G**. Representative immunofluorescence staining for labeling reactive oxygen species (ROS). Upper, dihydroethidium (DHE); middle, DAPI; down, Merge. **H**. Quantification of the ROS level (n=4 per group). For above data, means  $\pm$  SD, one - way ANOVA (Tukey post- test).  $P > 0.05$ , non-significant (ns), \*  $P < 0.05$ , \*\*  $P < 0.01$ , \*\*\*  $P < 0.001$ , \*\*\*\*  $P < 0.0001$ . DC: DOX+ 0.1mg/kg colchicine daily.
